# Supplementary material for: Rapid analysis of insecticidal metabolites from the entomopathogenic fungus Beauveria bassiana 331R using UPLC-Q-Orbitrap MS
Source: Research Square preprint supplement (doi:10.21203/rs.3.rs-3333398/v1), 2023-09-14
Supplement: Supplementary file 1 [file 65fec905779cc9fe32521d3f.docx]

**Supplementary Table S1.** Measurement efficiency of secondary metabolite based on solvent variations

| Solvent | Solvent  conc. | Reagent conc.  (ug/L) | Measured concentration (µg/L, mean ± standard error) | | | | | | | |
| --- | --- | --- | --- | --- | --- | --- | --- | --- | --- | --- |
| Bassianin | Bassianolide | Beauvericin | Beauveriolide Ⅰ | Enniatin_A | Enniatin_A1 | Enniatin_B | Tenellin |
| D.W. |  | 500 | ND | 19.4±19.4 | 143.0±4.2 | 32.0±1.5 | 156.0±9.3 | 149.4±8.0 | 249.6±5.3 | ND |
|  |  | 1000 | ND | 62.4±10.0 | 119.2±34.2 | 24.8±11.5 | 240.7±15.8 | 268.4±27.7 | 552.3±7.0 | ND |
| MeOH | 20% | 500 | 32.0±16.2 | 144.6±3.3 | 211.0±2.2 | 220.0±10.2 | 306.3±1.9 | 336.3±6.9 | 379.6±10.8 | ND |
|  |  | 1000 | 117.6±11.2 | 281.2±12.2 | 415.7±6.5 | 377.0±32.9 | 562.8±16.4 | 760.2±7.5 | 840.1±19.9 | 84.3±16.7 |
|  | 50% | 500 | 422.4±12.3 | 595.7±5.8 | 562.1±8.9 | 598.2±4.8 | 469.5±5.2 | 543.0±6.7 | 529.6±9.6 | 314.7±3.5 |
|  |  | 1000 | 924.4±8.3 | 1205.5±30.7 | 1098.6±9.2 | 1164.2±17.9 | 1101.3±18.2 | 1140.3±10.1 | 1021.3±18.6 | 754.9±28.7 |
|  | 70% | 500 | 540.1±0.6 | 616.0±6.4 | 575.7±8.9 | 594.0±8.3 | 497.5±1.0 | 513.4±0.1 | 522.1±15.8 | 490.6±14.5 |
|  |  | 1000 | 1146.7±4.7 | 1270.1±8.0 | 1136.4±22.1 | 1214.6±24.5 | 1112.5±20.4 | 1073.0±25.4 | 1064.6±7.7 | 987.0±20.7 |
|  | 100% | 500 | 531.1±6.9 | 611.2±5.4 | 560.5±6.4 | 616.8±1.6 | 478.6±1.8 | 486.9±10.1 | 516.7±9.6 | 512.5±5.5 |
|  |  | 1000 | 1079.9±2.9 | 1249.4±20.0 | 1103.9±27.9 | 1128.2±1.5 | 1053.6±20.4 | 1026.3±11.4 | 987.0±5.6 | 981.2±6.0 |
| EtOH | 20% | 500 | 70.6±5.6 | 129.4±6.2 | 247.0±6.2 | 330.1±17.1 | 338.1±8.4 | 336.0±8.1 | 434.4±12.2 | 24.3±11.8 |
|  |  | 1000 | 140.7±4.5 | 235.2±21.6 | 492.9±15.6 | 333.8±12.0 | 679.6±4.1 | 715.6±3.3 | 919.5±11.6 | 196.4±7.8 |
|  | 50% | 500 | 508.6±3.6 | 556.7±3.3 | 541.9±8.3 | 552.4±8.2 | 453.6±7.8 | 478.9±9.2 | 463.8±3.6 | 413.5±11.3 |
|  |  | 1000 | 1031.2±2.7 | 1070.6±2.8 | 1049.0±21.4 | 1106.7±15.2 | 1018.6±26.6 | 957.6±11.8 | 984.9±25.4 | 872.0±24.7 |
|  | 70% | 500 | 504.0±3.4 | 552.7±5.1 | 513.6±1.9 | 539.3±2.1 | 433.3±2.2 | 468.7±0.1 | 516.7±1.7 | 501.0±4.7 |
|  |  | 1000 | 1051.3±15.5 | 1114.6±18.6 | 1031.3±27.8 | 1069.1±1.7 | 1005.0±18.2 | 971.3±20.6 | 946.2±27.4 | 998.5±10.5 |
|  | 100% | 500 | 499.5±4.1 | 542.9±4.8 | 515.4±6.0 | 615.1±11.3 | 477.6±5.6 | 546.1±10.9 | 510.1±7.0 | 540.3±4.0 |
|  |  | 1000 | 984.5±9.9 | 1076.8±3.6 | 1070.8±22.5 | 1122.7±23.0 | 1064.7±27.7 | 843.9±14.0 | 1006.8±24.3 | 1056.6±24.7 |
| Values are mean ± standard deviations of three (n = 3) measurements.  *ND: not detected | | | | | | | | | | |
